# Supplementary material
Source: bioRxiv or medRxiv preprint supplement (https://www.biorxiv.org/highwire/filestream/139099/field_highwire_adjunct_files/4/458836-5.pdf)
Supplement: Supplementary file [file 458836-5.pdf]

**Table S1.** List of the nutrient solutions with their concentrations used for different growing environments of tomato plants.

| <b>Maternal Environment*</b> | <b>NH4</b> | <b>K</b> | <b>Ca</b> | <b>Mg</b> | <b>NO3</b> | <b>CL</b> | <b>SO4</b> | <b>P</b> |
|------------------------------|------------|----------|-----------|-----------|------------|-----------|------------|----------|
| <b>Standard</b>              | 1.2**      | 7        | 4.2       | 1.8       | 12.4       | --        | 3.4        | 1        |
| <b>Very Low Phosphate</b>    | 1.2        | 6.9      | 4.2       | 1.8       | 12.4       | 0.5       | 3.6        | 0        |
| <b>Low Phosphate</b>         | 1.2        | 7        | 4.2       | 1.8       | 12.4       | 0.5       | 3.6        | 0.1      |
| <b>High Phosphate</b>        | 1.2        | 8.6      | 5         | 1.8       | 12.4       | --        | 3          | 5        |
| <b>Very High Phosphate</b>   | 1.2        | 9.4      | 7.1       | 1.8       | 12.4       | --        | 3          | 9.1      |
| <b>Very Low Nitrate</b>      | 0          | 7        | 4.2       | 1.8       | 0          | 12.6      | 3.6        | 1        |
| <b>Low Nitrate</b>           | 0.24       | 7        | 4.2       | 1.8       | 2.4        | 8.64      | 3.6        | 1        |
| <b>High Nitrate</b>          | 6          | 7.8      | 4.2       | 1.8       | 14.4       | 2.2       | 3.6        | 1        |
| <b>Very High Nitrate</b>     | 13         | 7        | 4.2       | 1.8       | 24         | --        | 3.5        | 1        |

\* EC for all the environments: 2.2.

\*\* mM
